# Supplementary material for: The effect of the stacking fault on the diffusion of chemisorbed hydrogen atoms inside few-layered graphene
Source: Royal Society of Chemistry journal article supplement (doi:10.1039/c3ra46626d), 2013-12-11
Supplement: c3ra46626d.pdf [file c3ra46626d.pdf]

## Electronic Supplementary Information

# The effect of the stacking fault on the diffusion of chemisorbed hydrogen atoms inside few-layered graphene

Dong Hyen Chung<sup>a</sup>, Hyein Guk<sup>a</sup>, Daejin Kim<sup>a,b</sup>, Sang Soo Han<sup>c</sup>, Noejung Park<sup>d</sup>, Kihang Choi<sup>b</sup>,  
Seung-Hoon Choi<sup>a\*</sup>

<sup>a</sup>Insilicotech Co., Ltd. C-602, Korea Bio Park, 694-1, Sampyeong-dong, Bundang-gu, Seongnam-si,  
Gyeonggi-do 463-400, Korea

<sup>b</sup>Department of Chemistry, Korea University, 145, Anam-ro, Seongbuk-gu, Seoul 136-701, Korea

<sup>c</sup>Center for Computational Science, Korea Institute of Science and Technology, Hwarangno 14-gil 5,  
Seongbuk-gu, Seoul 136-791, Korea

<sup>d</sup>Interdisciplinary School of Green Energy and Low Dimensional Carbon Materials Center, Ulsan  
National Institute of Science and Technology, UNIST-gil 50, Ulsan 689-798, Korea

a) BIL

2A<sub>u</sub>

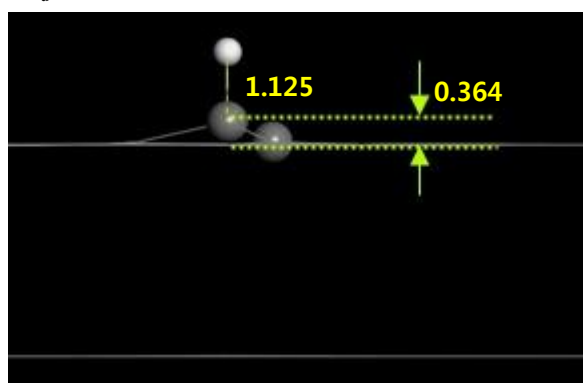

2B<sub>u</sub>

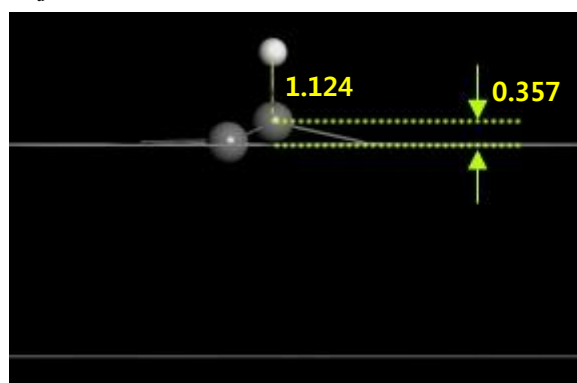

2A<sub>d</sub>

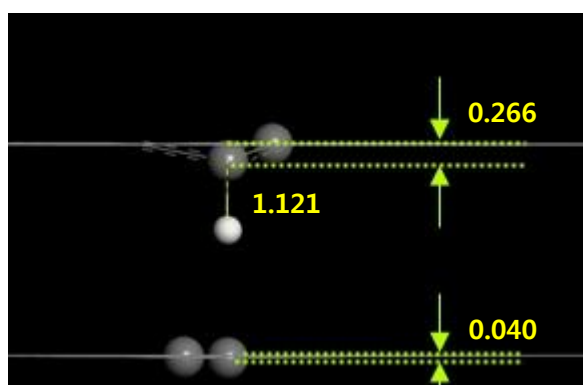

2B<sub>d</sub>

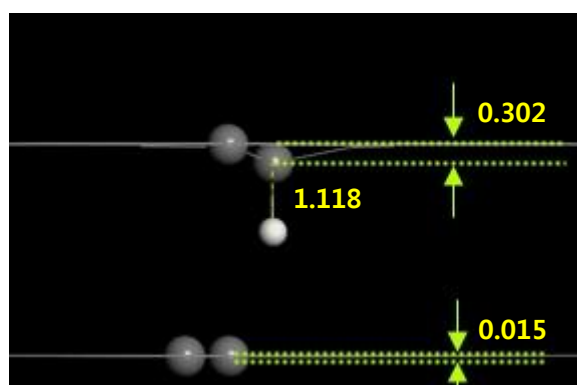

b) TEL

4A<sub>u</sub>

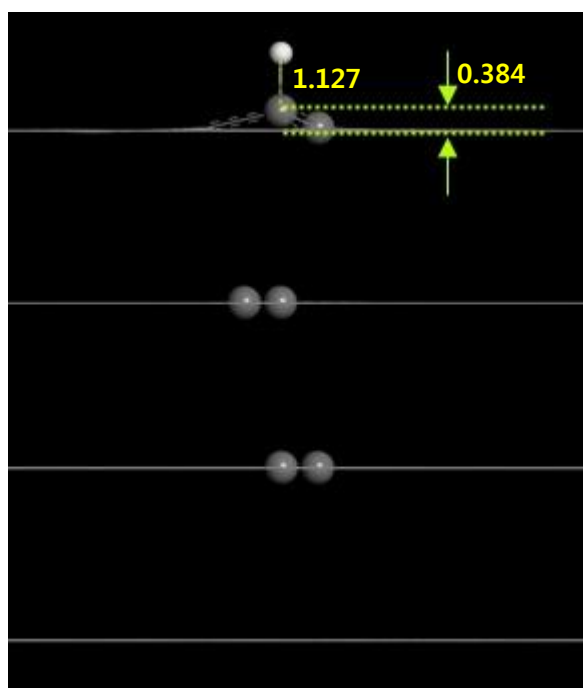

4B<sub>u</sub>

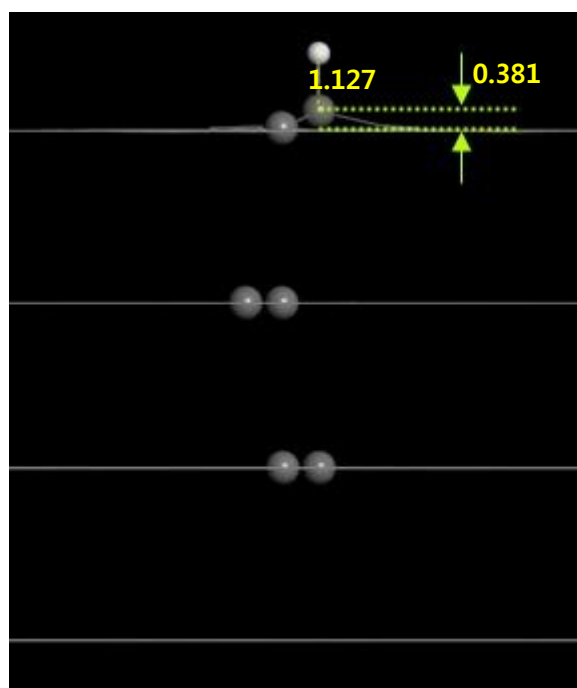

4A<sub>d</sub>

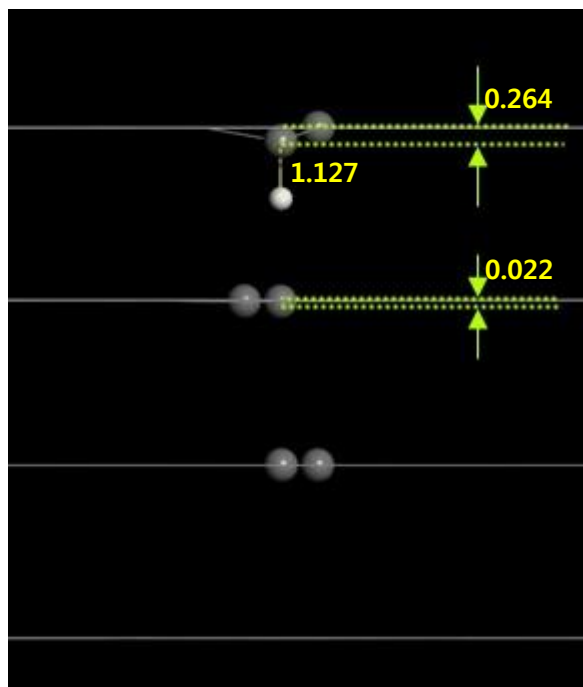

4B<sub>d</sub>

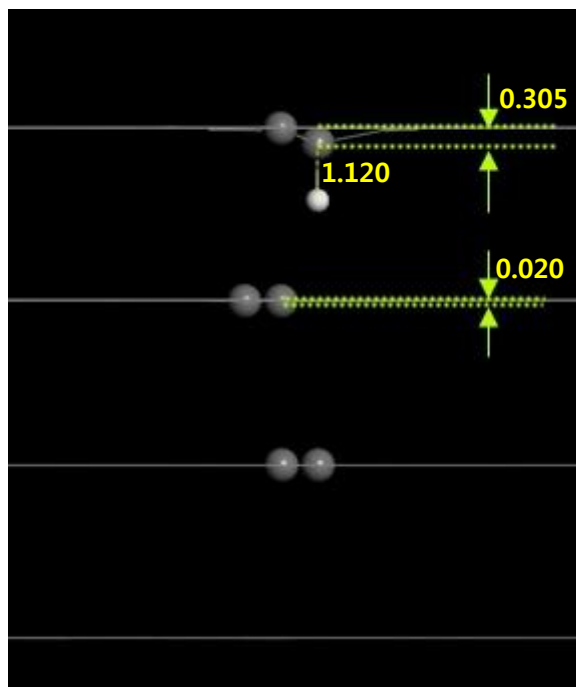

3A<sub>u</sub>

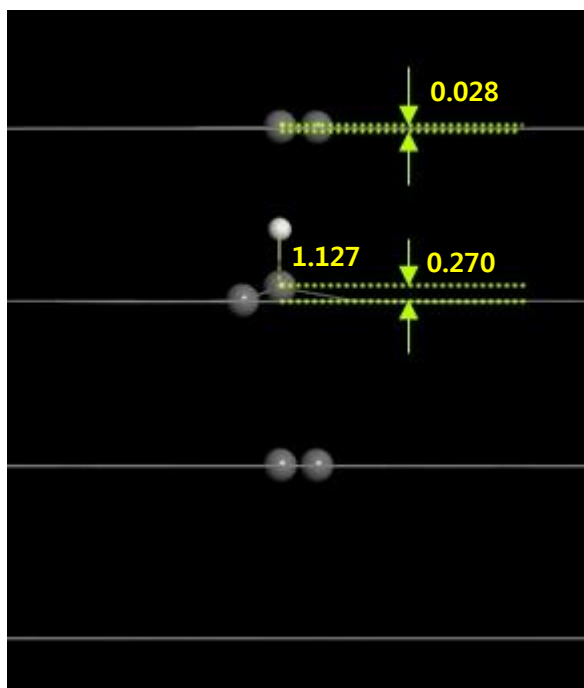

3B<sub>u</sub>

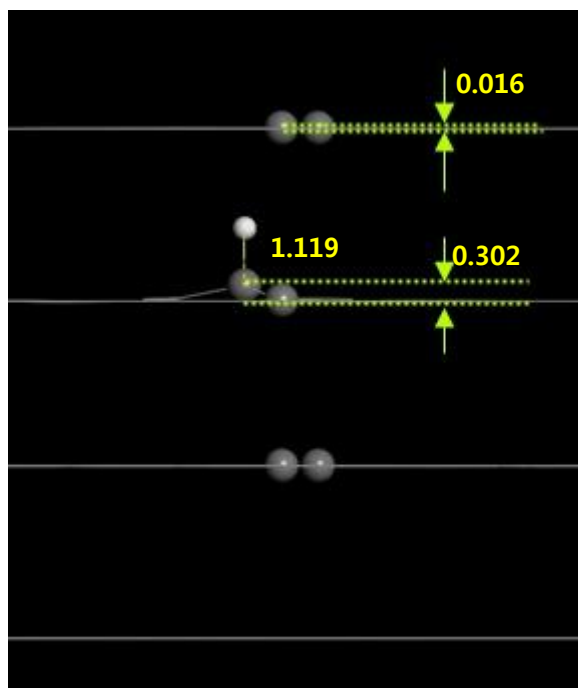

3A<sub>d</sub>

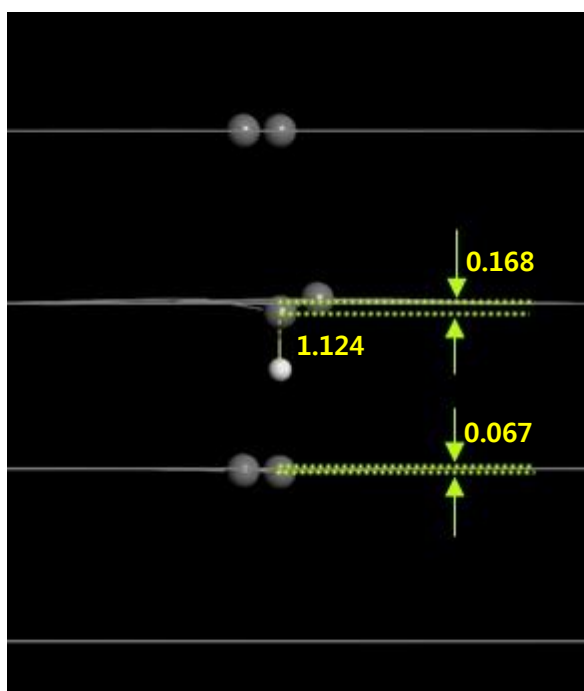

3B<sub>d</sub>

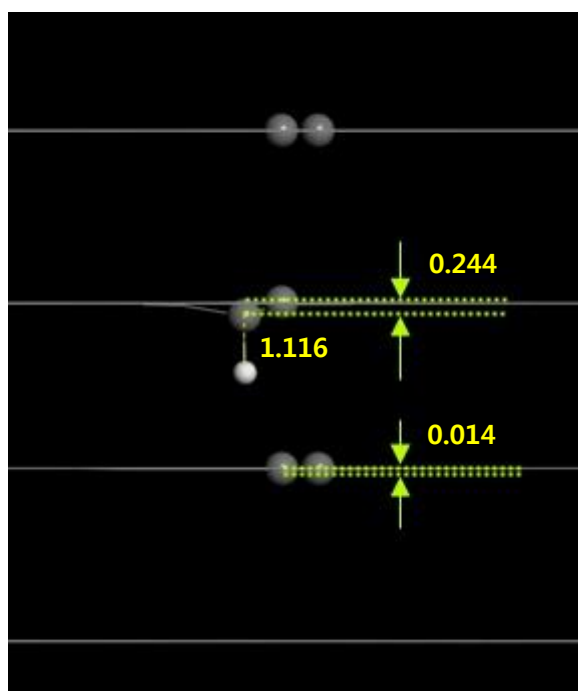

**Fig. S1.** The hydrogen binding structures in a) BIL, and b) TEL. The gray balls and lines are for graphene sheets and the white ball is the hydrogen atom. The unit of length is the angstrom.

a) MNL

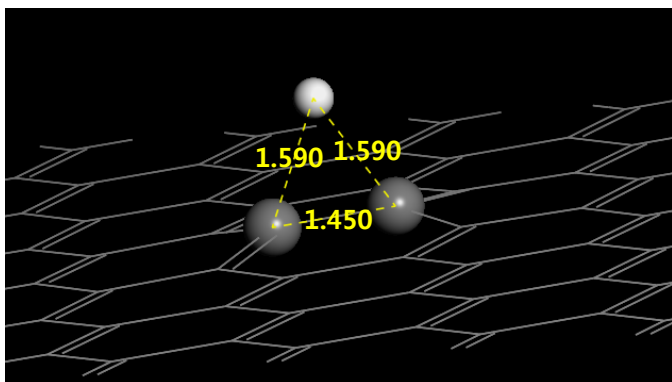

b) BIL

C-C distance

C-H distances

$2A_u \rightarrow 2B_u$

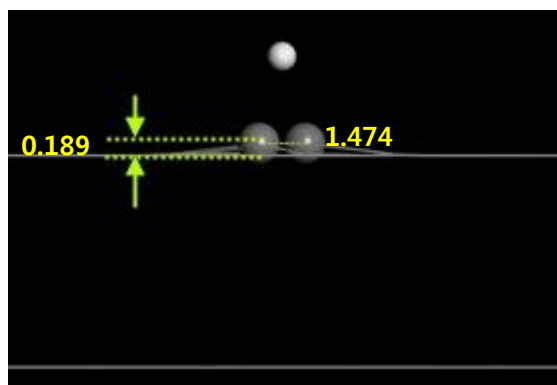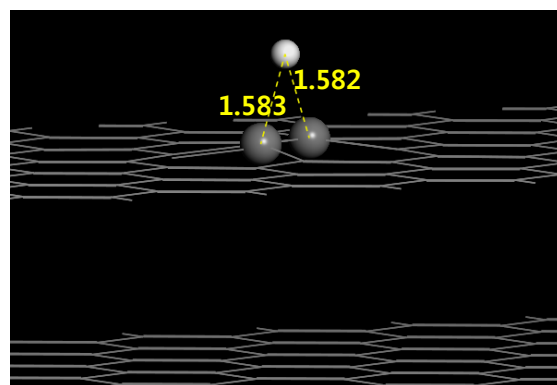

$2A_d \rightarrow 2B_d$

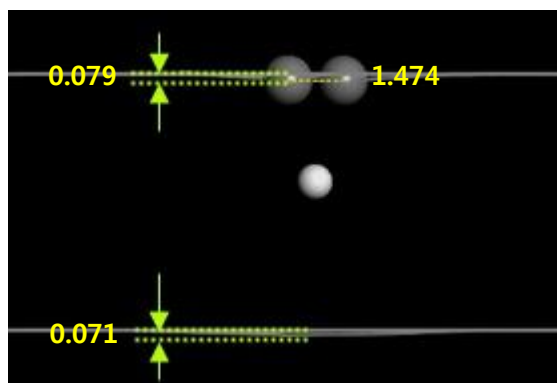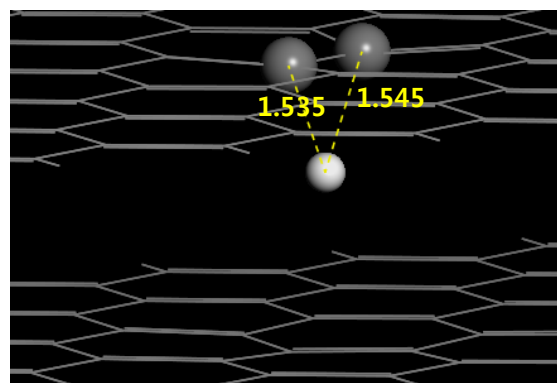

$2A_d \rightarrow 1A_u$

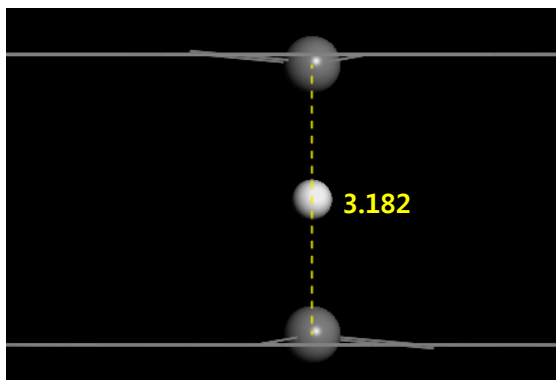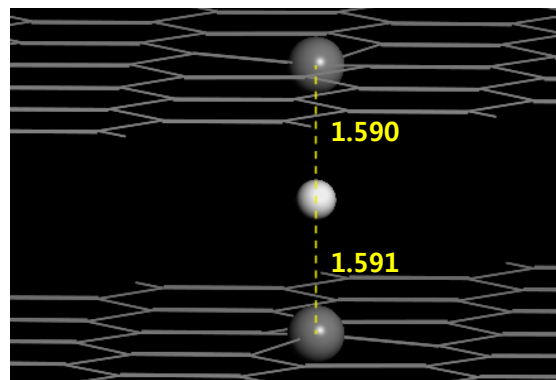

$2A_d \rightarrow 1B_u$

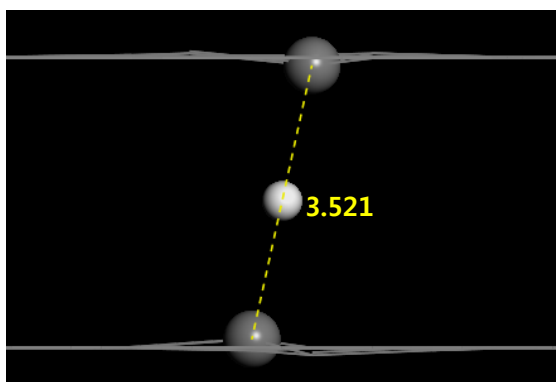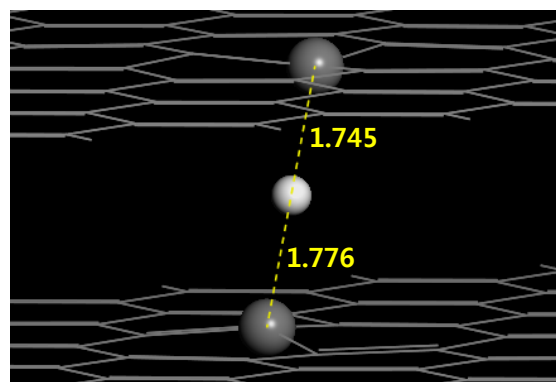

$2B_d \rightarrow 1B_u$

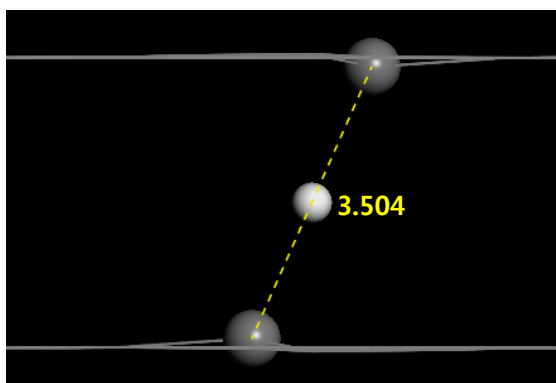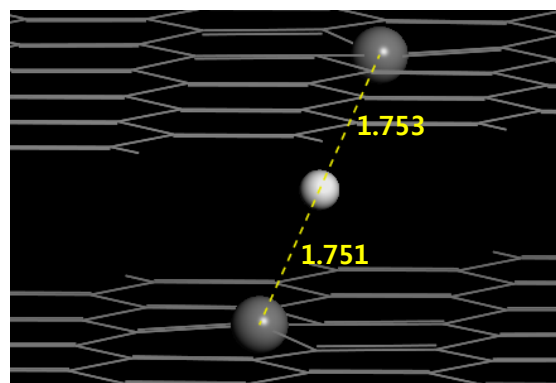

c) TEL

C-C distance

C-H distances

$4A_u \rightarrow 4B_u$

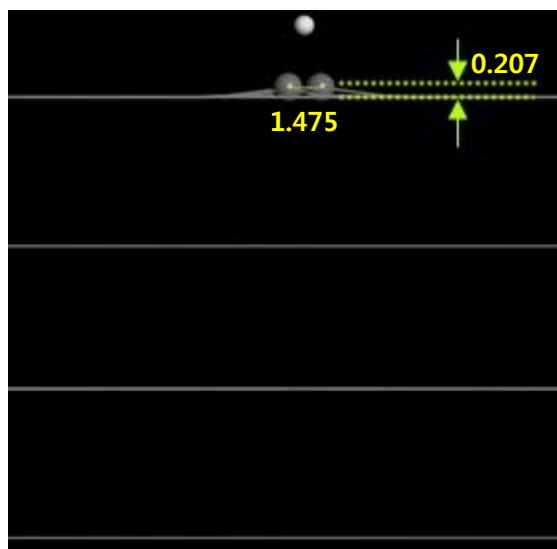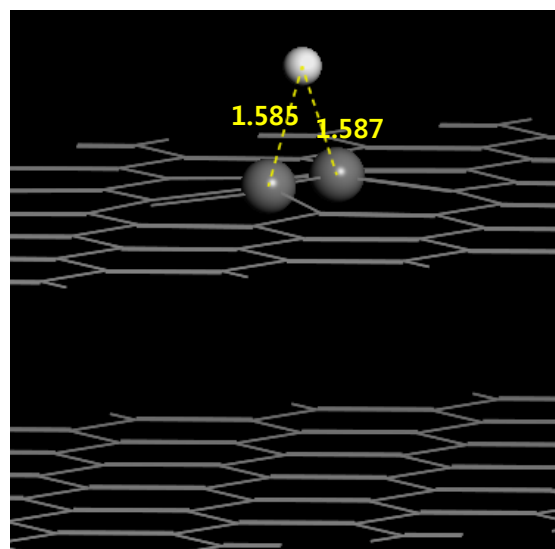

$4A_d \rightarrow 4B_d$

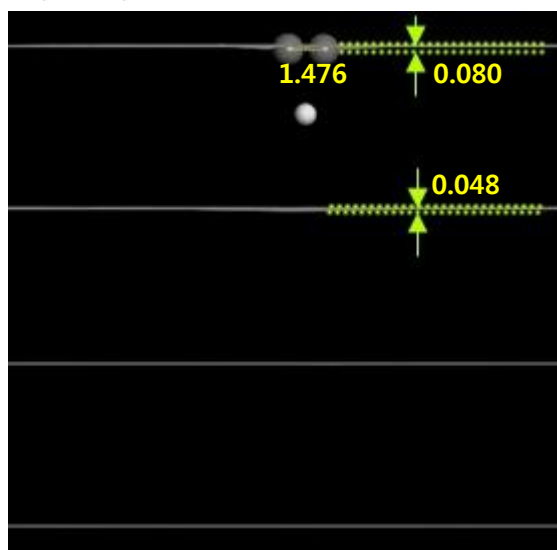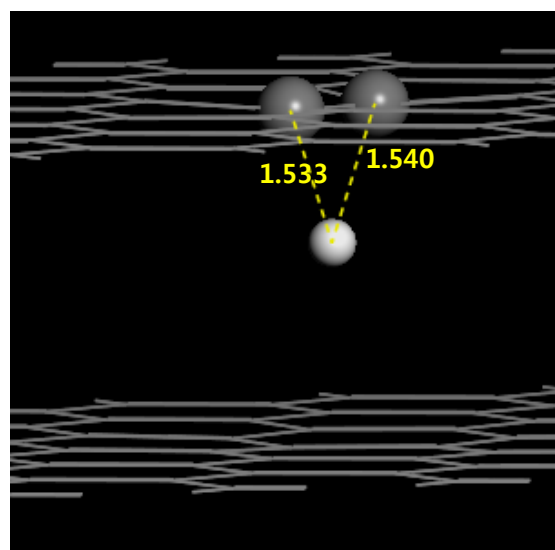

$3A_u \rightarrow 3B_u$

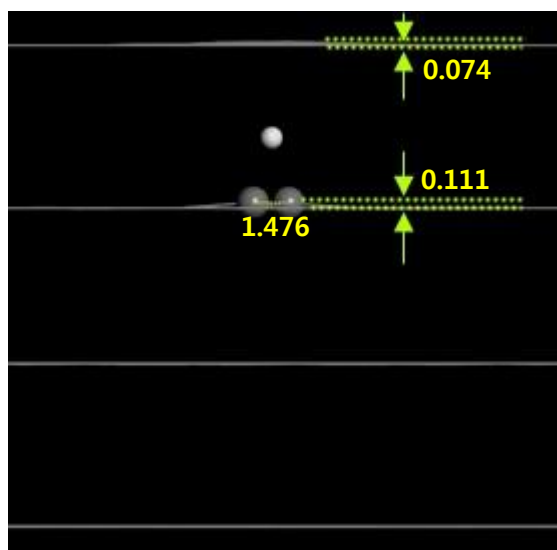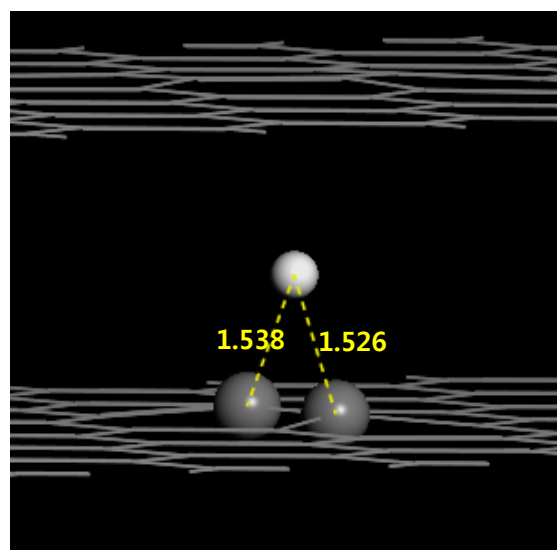

$3A_d \rightarrow 3B_d$

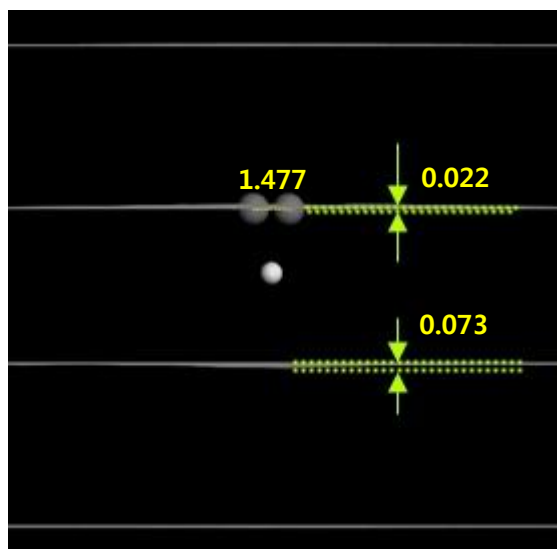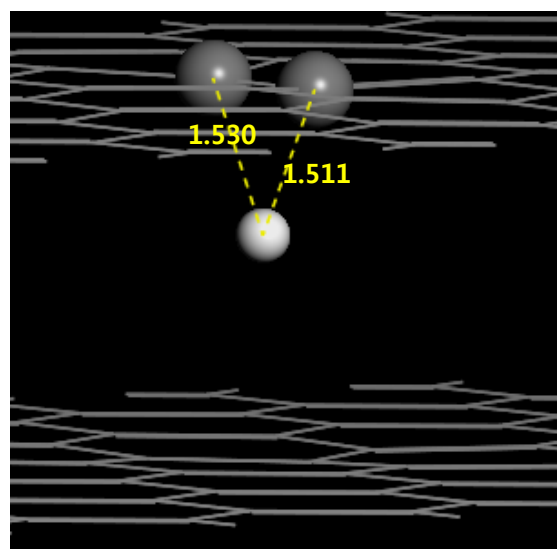

$4A_d \rightarrow 3A_u$

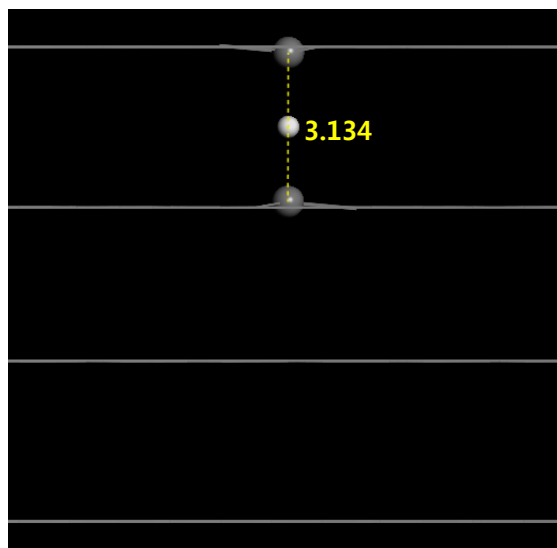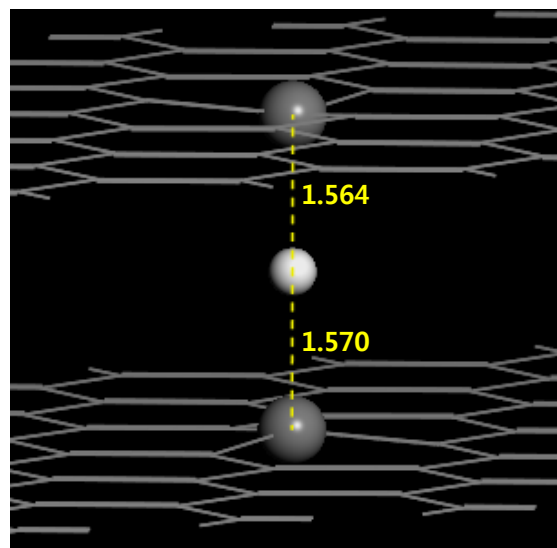



$4A_d \rightarrow 3B_u$

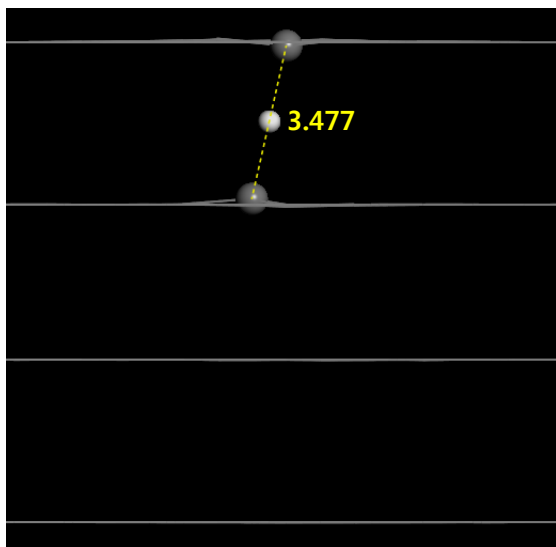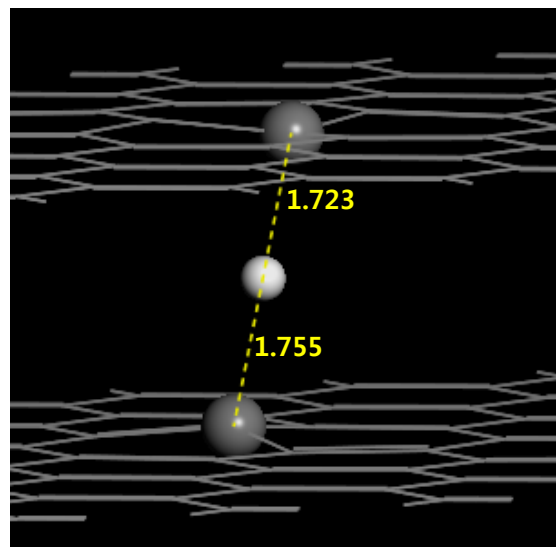

$4B_d \rightarrow 3B_u$

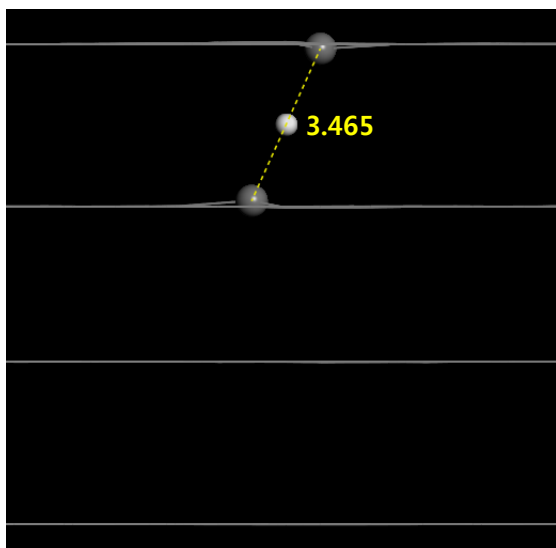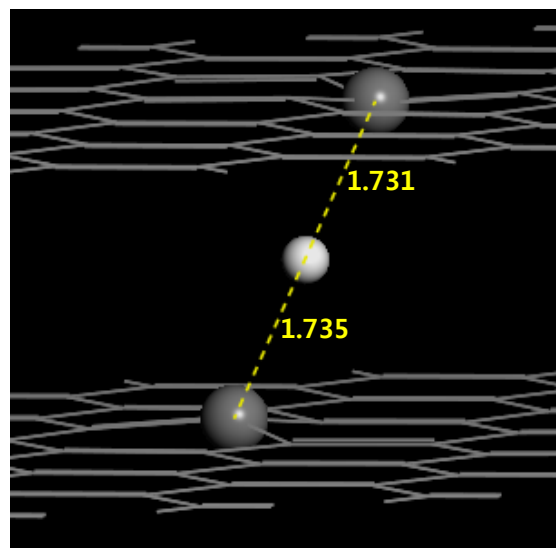

$3A_d \rightarrow 2A_u$

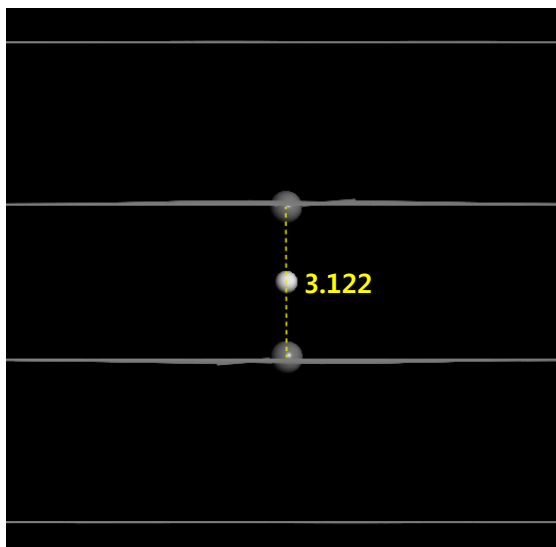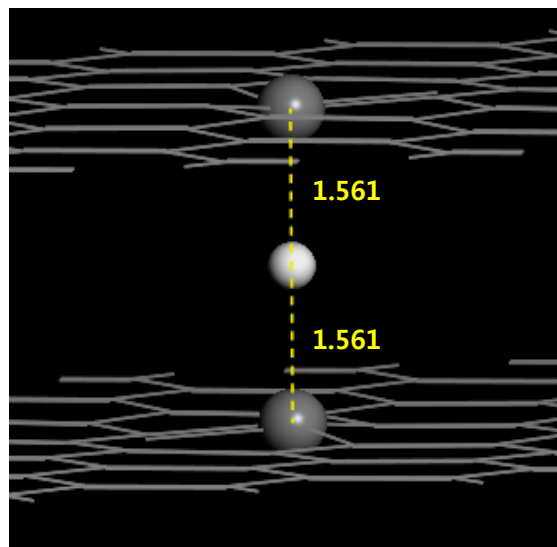

$3A_d \rightarrow 2B_u$

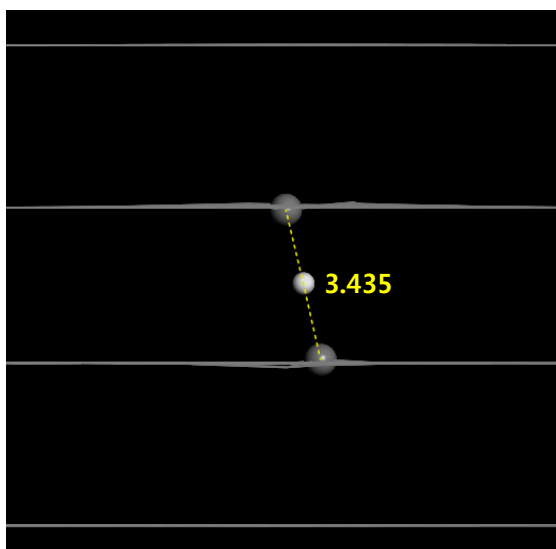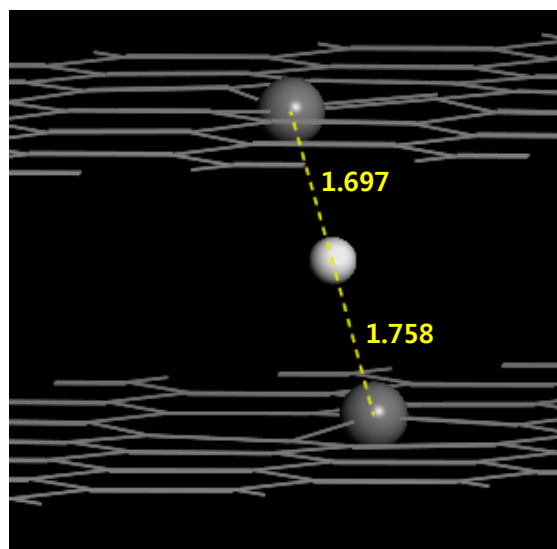

$3B_d \rightarrow 2B_u$

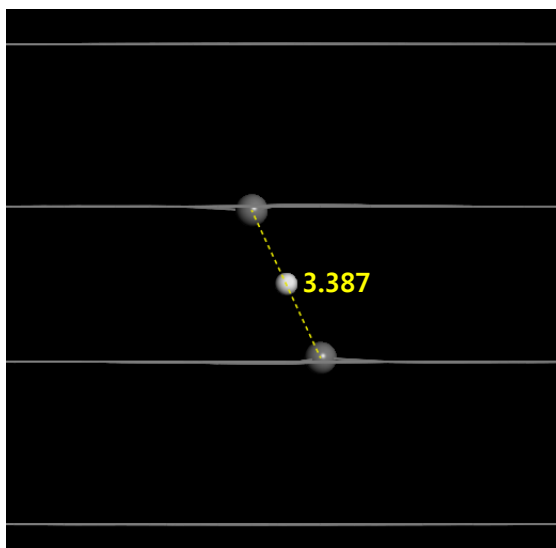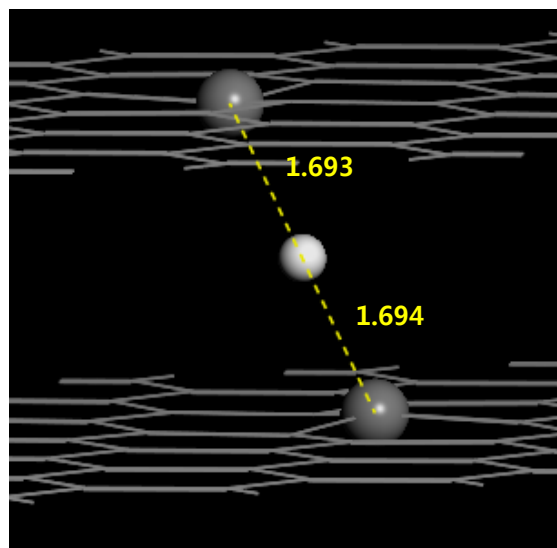

d) ZIG

C-C distance

C-H distances

1

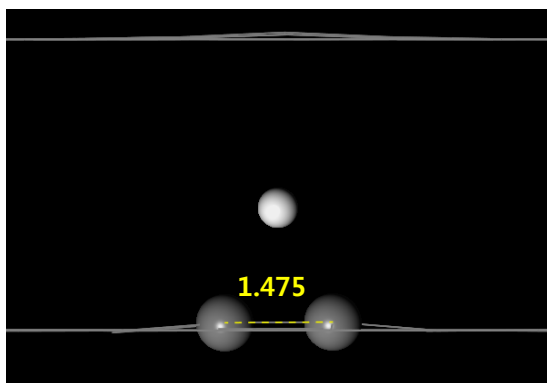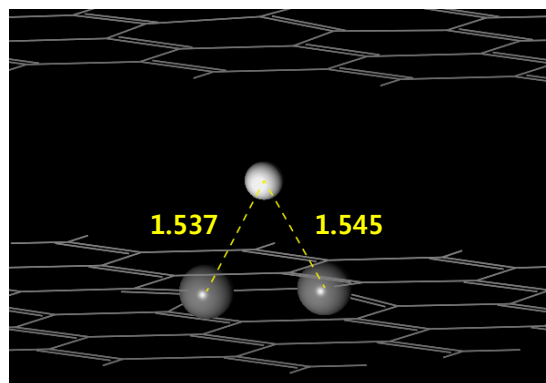

2

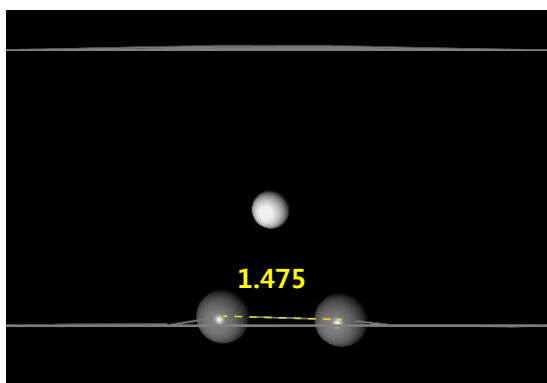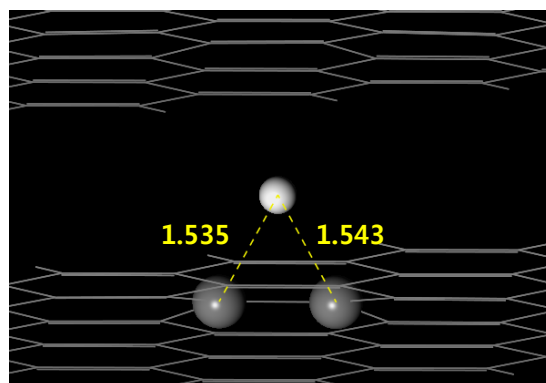

3

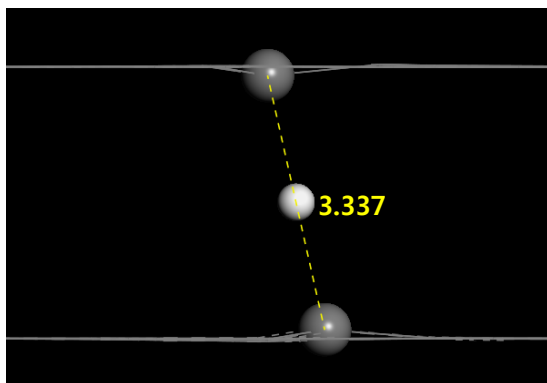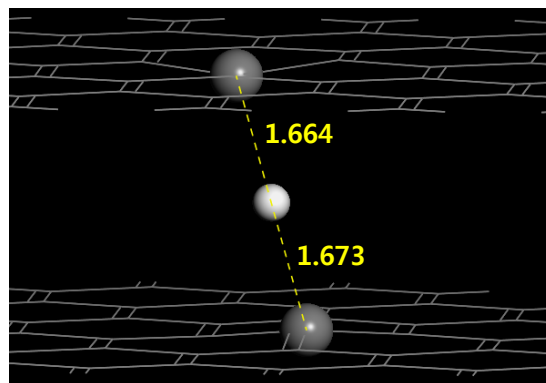

4

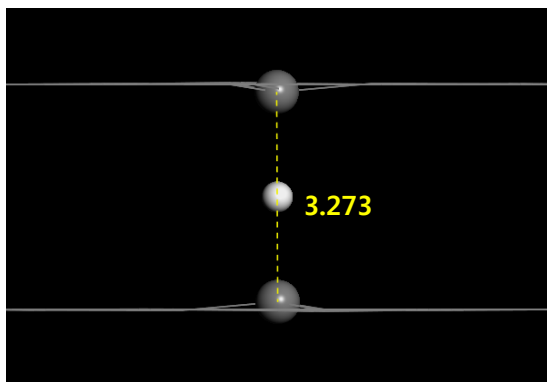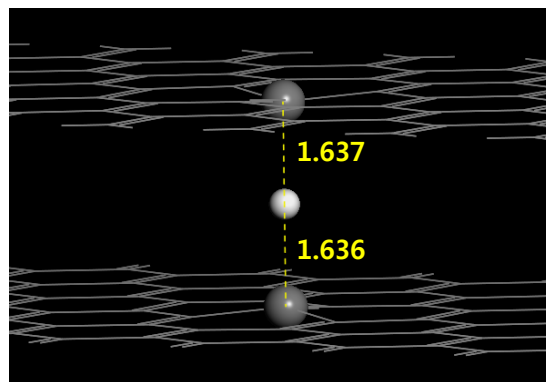

5

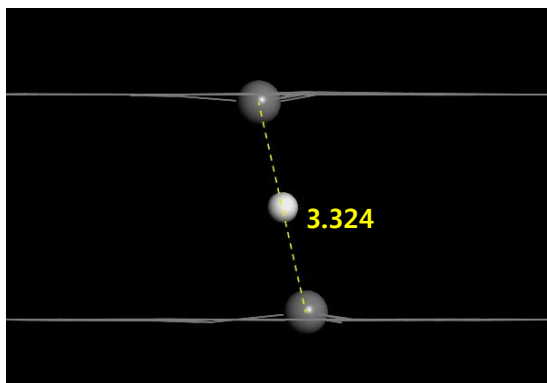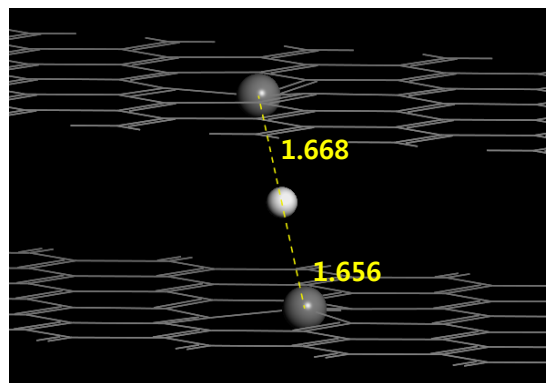

6

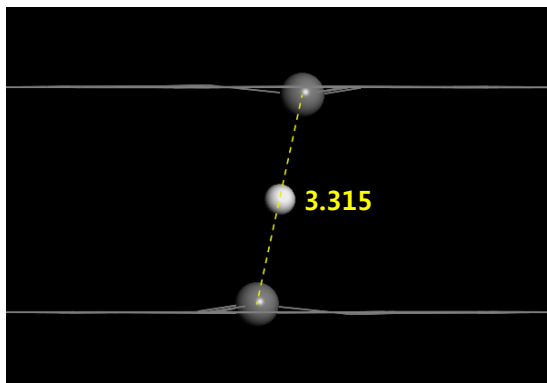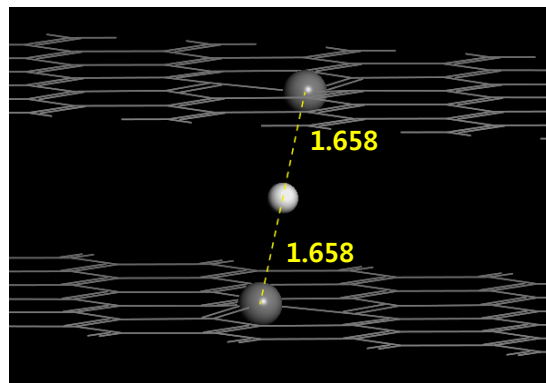

e) ARM

C-C distance

C-H distances

1

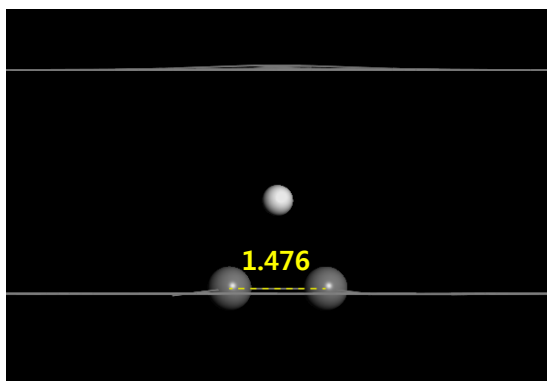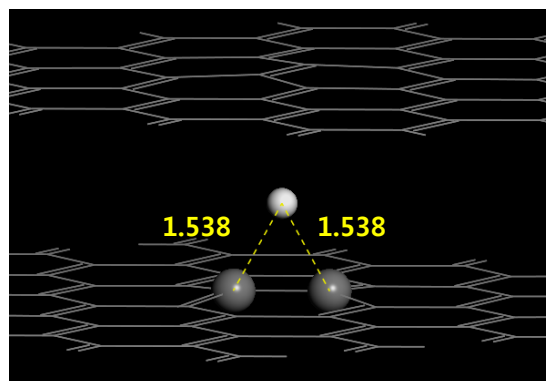

2

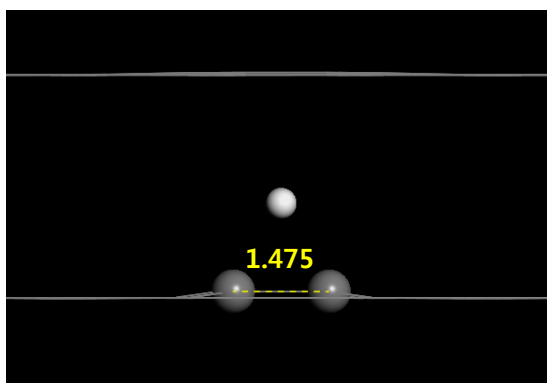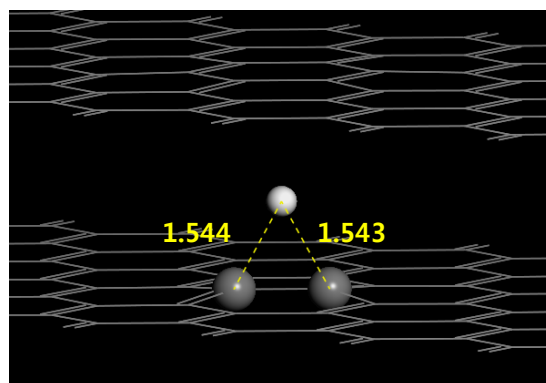

3

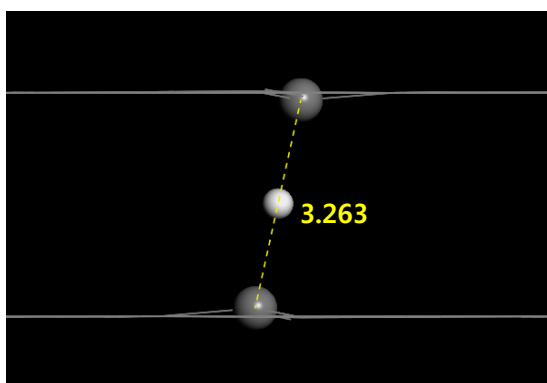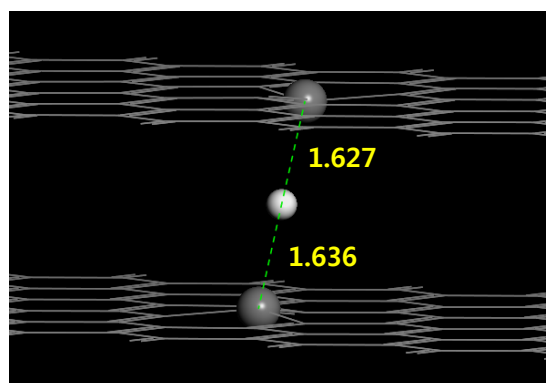

4

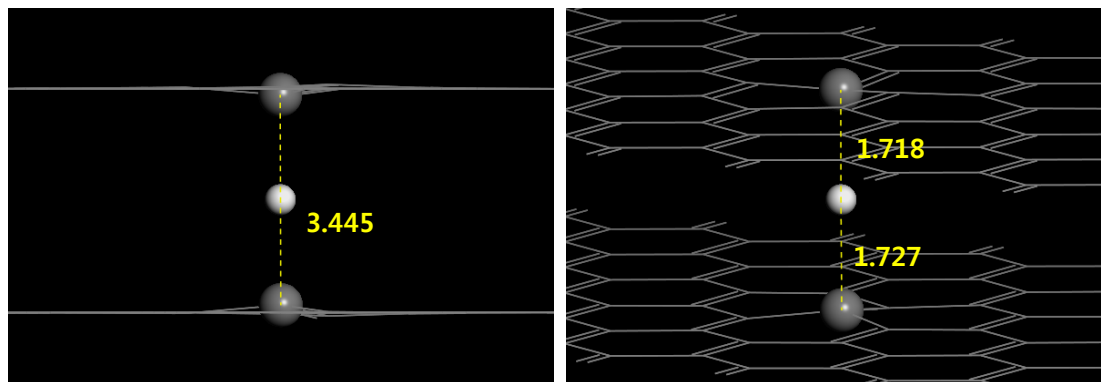

**Fig. S2.** The transition state structures. The gray balls and lines are for graphene sheets and the white ball is the hydrogen atom. The unit of length is the angstrom.

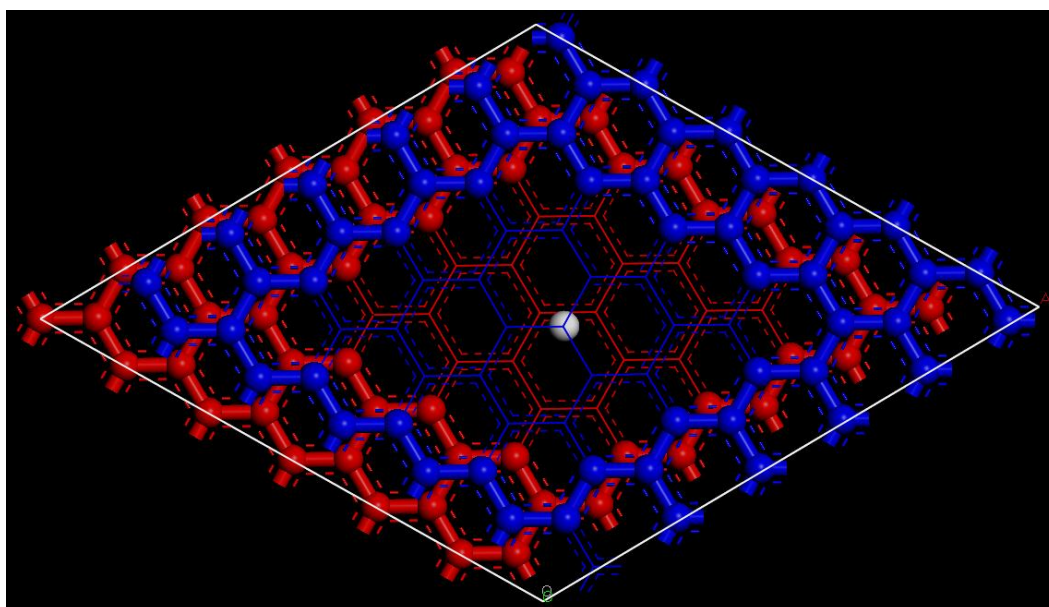

**Fig. S3.** The ball-and-stick model represents the fixed carbon atoms. The blue carbons are in the upper layer and the red ones are in the lower layer.
